# Supplementary material for: Neo-Epitopes—Fragments of Cartilage and Connective Tissue Degradation in Early Rheumatoid Arthritis and Unclassified Arthritis
Source: PLoS One. 2016 Mar 28;11(3):e0149329. doi: 10.1371/journal.pone.0149329 (PMC4809616; doi:10.1371/journal.pone.0149329)
Supplement: S1 Dataset — (XLS) [file pone.0149329.s001.xls]

## Sheet: SPSS file
B nr	VisitNr	Sex	Age at VisitDt	Race	RFpositivity	aCCPpositivity	ArthritisDt	IgMRf	CCP	ESR	CRP	DAS28	TOTTJC68	TOTSJC66	VASpain	Firstdiagnosis_2010	FUdiagn2yr_2010	DiagnosticoutcomeACR2010	prognostic outcome after 2 yr FU	VICM (ng/ml)	C1M (ng/ml)	C2M (ng/ml)	C3M (ng/ml)	CRPM (ng/ml)	Log transformed VICM	Log transformed C1M	Log transformed C2M	Log transformed C3M	Log transformed CRPM
1	1	2	39.2055	1	1	1	2008-04-18	229	428	12	1	3.11	1	1	28	1	1	1	2	13.288	22.337	0.243	24.032	8.68	1.12346	1.34902	-0.614394	1.38079	0.93852
3	1	1	61	2	2	2	-1	12	6	27	12.6	4.7	11	3	65	9	9	0	-1	60.64	53.27	0.24	24.044	9.508	1.78276	1.72648	-0.619789	1.38101	0.978089
4	1	2	52.0027	1	2	1	2008-04-28	3	1854	12	11.7	5.86	40	16	76	1	1	1	1	30.064	51.267	0.3946	29.74	13.008	1.47805	1.70984	-0.403843	1.47334	1.11421
5	1	2	38.726	1	2	1	2008-06-02	11	55	5	1.1	2.64	0	2	68	9	9	0	2	4.052	15.577	0.168	16.4	5.664	0.607669	1.19248	-0.774691	1.21484	0.753123
6	1	1	59.789	1	1	1	2008-07-18	550	3359	34	9.1	6.54	14	15	70	1	1	1	3	9.984	40.73	0.2346	43.632	15.484	0.999305	1.60991	-0.629672	1.63981	1.18988
7	1	2	55.9041	1	1	1	2008-07-29	29	10938	5	5.9	3.82	3	7	60	1	1	1	3	13.152	37.488	0.206	28.056	12.308	1.11899	1.57389	-0.686133	1.44803	1.09019
8	1	2	30.4247	1	2	1	2007-12-01	6	790	9	24.4	3.12	4	2	25	1	1	1	3	10.58	107.789	0.194	38.74	13.94	1.02449	2.03257	-0.712198	1.58816	1.14426
9	1	2	46	1	2	2	-1	1	1	26	8.2	5.07	4	2	95	9	9	0	-1	21.588	56.559	0.224	28.384	9.064	1.33421	1.7525	-0.649752	1.45307	0.95732
11	1	2	40	2	1	1	-1	33	6228	54	10.6	5.32	10	5	34	1	1	1	-1	48.704	36.139	0.318	29.86	10.468	1.68756	1.55798	-0.497573	1.47509	1.01986
12	1	1	62.8384	1	2	1	2008-08-27	12	84	5	1.7	2.45	6	3	12	1	1	1	3	6.452	17.75	0.19	20.76	6.704	0.809694	1.2492	-0.721246	1.31723	0.826334
14	1	1	53.1671	1	2	1	2008-09-24	1	156	5	3	3.21	13	9	15	1	1	1	3	52.208	22.804	0.278	20.572	8.876	1.71774	1.35801	-0.555955	1.31328	0.948217
15	1	2	48.8384	1	2	2	2008-10-17	1	1	2	1.2	3.49	19	1	94	9	9	0	1	13.056	15.756	0.14	15.836	5.44	1.11581	1.19745	-0.853872	1.19965	0.735599
16	1	1	70.9671	1	2	2	2008-11-02	5	1	18	24.6	3.4	1	1	12	9	9	0	1	3.908	73.958	0.29	29.604	11.388	0.591955	1.86899	-0.537602	1.47135	1.05645
17	1	2	53.3616	1	1	1	2008-05-27	79	7547	40	9.5	4.56	13	5	19	1	1	1	3	17.812	42.507	0.238	37.124	14.38	1.25071	1.62846	-0.623423	1.56965	1.15776
20	1	2	81.6082	1	2	2	2008-12-22	3	1	37	7.2	6.41	25	24	30	1	1	1	2	7.56	47.192	0.184	26.336	7.004	0.878522	1.67387	-0.735182	1.42055	0.845346
21	1	2	34.2767	1	1	1	2008-12-15	68	1413	2	1.1	3.08	12	4	49	1	1	1	3	10.148	28.74	0.212	21.98	8.696	1.00638	1.45849	-0.673664	1.34203	0.93932
25	1	2	41.8055	3	2	1	2009-06-17	9	107	4	3.6	1.08	8	2	13	1	1	1	2	13.752	29.443	0.148	19.748	9.312	1.13837	1.46898	-0.829738	1.29552	0.969043
26	1	2	34.7753	1	1	1	2009-07-28	116	246	27	5	4.57	5	1	73	1	1	1	2	9.008	42.468	0.122	34.128	14.888	0.954628	1.62806	-0.91364	1.53311	1.17284
28	1	2	41	2	2	2	2009-10-07	1	5	17	1.8	3.34	2	1	15	9	9	0	1	4.7	22.436	0.452	25.32	7.492	0.672098	1.35095	-0.344862	1.40346	0.874598
30	1	2	63.0521	1	1	1	2009-11-18	13	298	61	29.9	5.13	4	6	43	1	1	1	2	1.98	57.456	0.234	79.196	16.276	0.296665	1.75934	-0.630784	1.8987	1.21155
31	1	2	41.2192	4	2	2	2008-06-27	19	1	18	10	5.52	19	4	52	1	1	1	-1	2.148	56.68	0.272	47.468	13.392	0.332034	1.75343	-0.565431	1.6764	1.12685
32	1	1	56	2	2	1	2009-02-20	7	1338	2	0.8	2.53	1	2	76	1	1	1	2	7.664	16.648	0.142	15.38	5.032	0.884455	1.22136	-0.847712	1.18696	0.701741
33	1	2	57	1	1	1	2009-11-01	102	499	2	0.6	2.69	3	1	82	1	1	1	2	22.296	34.981	0.156	31.144	6.904	1.34823	1.54383	-0.806875	1.49337	0.839101
35	1	2	63.9342	1	1	1	2010-03-03	245	3168	11	6.9	4.23	15	7	22	1	1	1	2	6.96	107.582	0.092	24.444	8.192	0.842609	2.03174	-1.03621	1.38817	0.91339
37	1	2	40	1	2	2	2010-01-17	12	1	5	4	3.84	10	2	89	9	9	0	2	7.768	32.235	0.172	21.496	8.396	0.890309	1.50833	-0.764472	1.33236	0.924072
38	1	1	48.6356	1	1	1	2010-03-31	88	505	7	0.6	3.57	6	4	23	1	1	1	2	45.704	17.204	0.1774	17.276	10.404	1.65995	1.23563	-0.751046	1.23744	1.0172
39	1	2	56	4	1	1	2010-02-17	230	125	11	0.6	2.77	1	1	28	1	1	1	2	5.92	25.891	0.201	32.008	13.232	0.772322	1.41315	-0.696804	1.50526	1.12163
40	1	1	61	1	2	1	2010-02-15	46	258	49	17.5	3.72	1	1	5	1	1	1	2	0.812	70.637	0.24066	42.432	16.088	-0.090444	1.84903	-0.618596	1.62769	1.2065
42	1	2	31.4603	3	2	1	2010-06-03	12	2286	37	1.4	5.81	16	5	100	1	1	1	-1	29.872	25.793	0.218	33.872	16.868	1.47526	1.4115	-0.661544	1.52984	1.22706
43	1	1	59	1	2	2	2010-05-11	8	1	17	1.3	3.71	3	1	47	9	9	0	1	4.032	21.053	0.16	21.76	9.024	0.605521	1.32331	-0.79588	1.33766	0.955399
45	1	2	39.3671	3	1	1	2010-07-14	442	301	5	1.8	5.53	42	9	72	1	1	1	2	22.792	28.673	0.351	42.336	22.496	1.35778	1.45747	-0.454693	1.62671	1.35211
46	1	2	54	1	1	2	2010-07-30	69	1	9	6.4	6.18	43	11	81	1	1	1	2	33.2	52.116	0.129	34.828	15.808	1.52114	1.71697	-0.88941	1.54193	1.19888
48	1	2	65.589	1	1	1	2010-07-14	123	135	24	8.4	5.03	21	6	11	1	1	1	2	5.504	57.528	0.2154	30.944	13.672	0.740678	1.75988	-0.666754	1.49058	1.13583
49	1	2	59	1	2	2	2010-07-27	1	8	22	1.2	3.55	1	1	2	9	9	0	1	6.432	16.525	0.202	17.196	6.364	0.808346	1.21814	-0.694649	1.23543	0.80373
50	1	2	72	1	1	2	2010-08-30	88	1	14	0.9	4.75	19	5	70	1	1	1	2	5.3	23.604	0.1866	39.952	12.02	0.724276	1.37299	-0.729088	1.60154	1.0799
51	1	2	34	4	2	1	2010-10-06	36	230	5	3.2	1.91	0	3	37	9	1	2	2	21.68	30.347	0.198	24.34	12.284	1.33606	1.48212	-0.703335	1.38632	1.08934
52	1	1	66	1	2	2	2010-06-16	26	9	12	5.8	2.98	1	3	14	1	1	1	3	10.264	36.167	0.248	38.08	30.76	1.01132	1.55831	-0.605548	1.5807	1.48799
53	1	2	53	1	2	1	2010-11-11	1	86	2	0.6	3.02	10	2	35	1	1	1	2	69.76	22.76	0.15	21.924	9.28	1.84361	1.35717	-0.823909	1.34092	0.967548
54	1	2	34	1	2	1	2010-11-24	31	141	8	1.4	3	3	2	18	9	9	0	2	6.016	34.759	0.186	25.016	12.788	0.779308	1.54107	-0.730487	1.39822	1.1068
55	1	1	52	1	2	2	2010-11-30	1	1	5	7.1	2.62	3	3	8	9	9	0	1	18.472	45.452	0.228	21.68	9.092	1.26651	1.65755	-0.642065	1.33606	0.958659
56	1	1	65	1	2	1	2010-12-20	16	233	27	10.5	3.6	1	2	74	1	1	1	-1	306.02	55.177	0.138	26.896	10.544	2.48575	1.74176	-0.860121	1.42969	1.02301
58	1	1	67	1	2	2	2010-12-06	1	1	2	0.6	2.11	0	5	84	9	1	2	3	4.488	22.859	0.366	16.052	7.176	0.652053	1.35906	-0.436519	1.20553	0.855882
59	1	2	67	1	2	2	2010-05-04	2	1	2	1.6	3.87	18	10	68	1	1	1	1	4.488	27.728	0.19	18.456	10.592	0.652053	1.44292	-0.721246	1.26614	1.02498
61	1	2	48	1	2	1	2011-01-20	1	110	5	1	3.19	6	3	34	1	1	1	2	11.872	21.427	0.172	23.028	8.524	1.07452	1.33096	-0.764472	1.36226	0.930643
62	1	1	61	1	2	2	2011-02-07	1	2	54	50	3.9	3	1	51	9	1	2	3	150.156	185.256	0.266	38.244	17.076	2.17654	2.26777	-0.575118	1.58256	1.23239
63	1	1	50	1	2	2	2011-01-13	13	2	8	2.8	2.74	1	3	15	9	9	0	-1	33.296	27.53	0.27	22.792	10.12	1.52239	1.43981	-0.568636	1.35778	1.00518
64	1	1	64	1	1	1	2010-12-29	120	43	14	22.3	3.56	1	11	5	1	1	1	2	14.776	67.373	0.172	34.168	14.356	1.16956	1.82849	-0.764472	1.53362	1.15703
65	1	2	61	1	2	2	2010-12-27	10	1	46	20.1	5.74	11	3	80	1	1	1	-1	36.848	111.547	0.156	24.952	8.4	1.56641	2.04746	-0.806875	1.39711	0.924279
66	1	2	50	1	1	2	2011-04-22	69	4	12	1.2	4.85	10	2	73	9	1	2	3	13.392	20.328	0.15	29.84	14.272	1.12685	1.30809	-0.823909	1.4748	1.15448
67	1	2	51	2	2	2	2011-06-08	1	7	31	9.8	6.89	22	13	92	1	1	1	-1	9.028	54.764	0.262	26.676	9.692	0.955592	1.7385	-0.581699	1.42612	0.986413
69	1	2	33	1	1	1	2011-09-05	582	410	29	7.8	3.9	1	1	33	1	1	1	-1	2.912	57.687	0.2186	36.376	19.912	0.464191	1.76108	-0.66035	1.56081	1.29911
71	1	2	61	1	1	1	2011-09-30	666	1923	9	0.6	3.12	3	4	25	1	1	1	-1	5.812	15.133	0.1466	19.464	9.604	0.764326	1.17993	-0.833866	1.28923	0.982452
72	1	2	63	1	2	2	2011-09-26	1	2	9	0.6	4.82	17	6	55	9	-1	-1	-1	3.312	20.831	0.374	16.472	5.412	0.52009	1.31871	-0.427128	1.21675	0.733358
73	1	1	31	1	2	2	2011-10-30	1	1	5	1.7	2.78	3	1	41	9	-1	-1	-1	3.9	18.738	0.17	20.284	7.552	0.591065	1.27272	-0.769551	1.30715	0.878062
74	1	2	34	-1	2	1	2011-10-31	13	682	2	0.7	2.98	4	2	71	1	1	1	-1	6.288	14.265	0.19	20.704	6.12	0.798513	1.15427	-0.721246	1.31605	0.786751
75	1	1	57	2	1	1	2012-01-12	563	2443	8	4.6	4.58	16	10	45	1	1	1	-1	24.332	36.92	0.226	36.86	14.732	1.38618	1.56726	-0.645892	1.56656	1.16826
76	1	2	49	1	1	1	2012-05-16	182	377	41	20.6	6.62	27	16	44	1	1	1	-1	14.8	140.917	0.184	38.036	14.216	1.17026	2.14896	-0.735182	1.58019	1.15278
77	1	2	84	1	1	1	2012-05-24	266	399	32	18	5.25	14	17	45	1	1	1	-1	26.168	85.878	0.23	37.452	16.612	1.41777	1.93388	-0.638272	1.57348	1.22042
78	1	1	42	1	1	1	2012-05-15	2759	545	34	24.8	5.99	17	11	83	1	1	1	-1	39.04	84.311	0.302	54.012	20.84	1.59151	1.92588	-0.519993	1.73249	1.3189
79	1	1	59	1	1	1	2012-07-05	1146	1942	32	13.9	6.58	30	9	47	1	1	1	-1	44.156	110.616	0.224	55.148	21.844	1.64499	2.04382	-0.649752	1.74153	1.33933
81	1	1	47	2	1	1	2012-09-13	325	1044	15	6.3	3.5	3	2	39	1	1	1	-1	34.22	31.479	0.216	35.616	13.44	1.53428	1.49802	-0.665546	1.55165	1.1284
82	1	2	27	1	1	1	2012-10-11	314	344	5	5	4.46	12	5	78	1	1	1	-1	6.168	32.464	0.276	33.172	10.788	0.790144	1.5114	-0.559091	1.52077	1.03294
84	1	1	31	1	1	1	2012-10-30	310	44	5	0.4	2.79	1	5	53	1	1	1	-1	54.708	20.471	0.242	23.072	9.088	1.73805	1.31114	-0.616185	1.36309	0.958468
97	1	2	24.4411	1	1	2	2004-03-10	34	3	11	4	4.89	23	4	94	1	1	1	3	8.532	16.642	0.236	15.448	4.988	0.931051	1.22121	-0.627088	1.18887	0.697926
112	1	1	52.3479	1	2	2	2004-06-01	1	1	7	1.3	2.06	1	1	0	9	9	0	1	26.864	20.901	0.27	28.824	10.96	1.42917	1.32017	-0.568636	1.45975	1.03981
209	1	1	56.2548	1	2	2	2008-01-22	1	3	11	2.4	3.69	19	9	53	1	1	1	1	0.688	17.196	0.048	29.436	13.432	-0.162412	1.23543	-1.31876	1.46888	1.12814
226	1	1	45	1	2	2	2008-06-17	1	2	14	19.4	2.16	0	1	0	9	9	0	1	2.544	19.825	0.248	22.148	10.1	0.405517	1.29721	-0.605548	1.34533	1.00432
240	1	2	34.6164	1	2	2	2008-12-01	9	4	27	2.5	6.7	31	25	78	1	1	1	-1	7.264	26.848	0.268	41.448	12.512	0.861176	1.42891	-0.571865	1.6175	1.09733
241	1	1	33.7918	1	2	2	2008-04-22	11	2	5	6.2	2.48	0	1	77	9	9	0	-1	12.008	39.352	0.205	24.088	12.024	1.07947	1.59497	-0.688246	1.3818	1.08005
243	1	2	32.1288	1	2	2	2008-12-11	1	1	8	3.8	2.65	0	1	51	9	9	0	-1	9.28	27.578	0.188	16.248	5.548	0.967548	1.44056	-0.725842	1.2108	0.744136
244	1	2	45.2877	2	2	2	2008-11-28	1	1	10	1.3	2.91	1	1	87	9	9	0	-1	9.14	20.534	0.196	21.556	6.804	0.960946	1.31247	-0.707744	1.33357	0.832764
245	1	1	29.9562	1	2	2	2008-10-01	1	1	110	237.1	6.85	5	31	50	1	1	1	-1	115.316	377.601	0.502	95.016	38.72	2.06189	2.57703	-0.299296	1.9778	1.58794
246	1	2	54.9452	1	2	2	2008-11-27	7	2	9	1	5.01	18	9	78	1	1	1	-1	31.476	26.55	0.236	32.956	11.936	1.49798	1.42406	-0.627088	1.51793	1.07686
250	1	1	46	2	2	1	2009-03-13	10	799	66	69.6	5.32	5	5	56	1	1	1	-1	15.8752	64.272	0.342	47.224	24.54	1.20072	1.80802	-0.465974	1.67416	1.38987
252	1	2	50.3616	4	1	1	2009-03-19	281	7368	27	4	4.93	12	5	68	1	1	1	-1	139.512	35.583	0.334	66.272	12.272	2.14461	1.55124	-0.476254	1.82133	1.08892
253	1	1	79.2932	1	2	1	2009-01-01	4	40	18	5.2	4.4	10	14	41	1	1	1	-1	5.956	42.311	0.186	34.244	15.216	0.774955	1.62645	-0.730487	1.53458	1.1823
257	1	2	51.8986	3	1	1	2009-07-03	13	2239	55	12.6	6.22	19	8	85	1	1	1	-1	50.832	63.77	0.29	40.632	17.7	1.70614	1.80462	-0.537602	1.60887	1.24797
258	1	2	58	1	1	2	2009-06-16	503	13	41	119.3	6.75	36	16	66	1	1	1	-1	2.556	263.915	0.104	70.412	28.184	0.407561	2.42146	-0.982967	1.84765	1.45
262	1	1	68	1	2	2	2009-11-16	1	2	71	23.1	3.89	1	1	4	9	9	0	-1	8.12	92.497	0.468	39.64	14.276	0.909556	1.96613	-0.329754	1.59813	1.15461
263	1	2	56.126	1	1	1	2009-11-26	527	106	64	16.8	6.43	11	18	60	1	1	1	2	3.264	37.437	0.16	41.516	11.84	0.51375	1.5733	-0.79588	1.61822	1.07335
265	1	1	41	4	2	2	2010-02-17	1	4	22	5.3	3.97	2	2	41	9	9	0	-1	13.012	53.851	0.174	30.472	14.284	1.11434	1.73119	-0.759451	1.4839	1.15485
266	1	1	41	-1	2	2	2009-01-01	5	2	27	0.6	4.55	1	1	100	9	9	0	-1	2.784	18.46	0.234	29.808	11.352	0.444669	1.26623	-0.630784	1.47433	1.05507
269	1	1	48	-1	2	2	2010-09-03	1	2	7	0.7	1.38	0	1	0	9	9	0	1	1.18	12.386	0.13	26.416	9.732	0.071882	1.09293	-0.886057	1.42187	0.988202
271	1	2	62	-1	1	1	2010-11-26	586	267	52	62.7	7.65	52	10	96	1	1	1	2	46.7	75.305	0.232	35.224	10.804	1.66932	1.87682	-0.634512	1.54684	1.03358
272	1	2	59	-1	2	2	2010-12-28	1	14	47	34.4	4.34	3	3	38	9	9	0	2	19.64	174.82	0.07	42.9	17.064	1.29314	2.24259	-1.1549	1.63246	1.23208
275	1	2	19	-1	2	2	2010-11-02	3	2	61	31.5	5.08	4	1	78	9	9	0	1	87.592	134.196	0.144	78.868	23.412	1.94246	2.12774	-0.841638	1.8969	1.36944
276	1	2	21	-1	2	2	2011-03-01	18	1	7	4.5	5.41	44	14	100	9	1	2	2	26.68	25.856	0.158	23.38	7.472	1.42619	1.41256	-0.801343	1.36884	0.873437
277	1	2	33	-1	2	2	2011-03-24	1	2	5	1.1	5.18	29	8	41	9	1	2	-1	8.86	24.302	0.176	21.848	8.964	0.947434	1.38564	-0.754487	1.33941	0.952502
278	1	2	21	-1	2	2	2011-02-07	1	2	97	132.3	7.82	26	17	53	1	1	1	3	32.788	256.674	0.188	58.876	288	1.51571	2.40938	-0.725842	1.76994	2.45939
280	1	2	25	-1	2	2	2012-01-23	8	2	5	3.7	2.15	5	5	77	9	-1	-1	-1	16.08	34.499	0.248	21.972	12.628	1.20629	1.53781	-0.605548	1.34187	1.10133
281	1	2	59	1	1	1	2012-01-18	1334	687	127	104.1	6.14	5	5	62	1	1	1	-1	83.356	159.331	0.29334	66.644	24.228	1.92094	2.2023	-0.532629	1.82376	1.38432
284	1	2	42	1	1	2	uk-nov-12	273	1	24	12.9	7.14	40	22	86	1	1	1	-1	106.976	27.633	0.196	35.236	12.072	2.02929	1.44143	-0.707744	1.54699	1.08178

## Sheet: Legend
B nr		B nr in combination with Biobank nr is patient specific
Sex
(Sex)	1	male
	2	female
Age at VisitDt (yr)
(Age at VisitDate (years))		Age of the patient at the VisitDt in years
Race
(Race)	1	caucasian
	2	negroid
	3	asian
	4	other
	-1	missing
RFpositivity
	1	positive
	2	negative
aCCPpositivity
	1	positive
	2	negative																			Hght(m)
ArthritisDt																					PackYear
(ArthritisDate)		Date of first arthritis																			VASpain
	-1	missing
IgMRf																					PhysAss
		Reference ranges, units, kits and analyzers regarding IgMRF																			PatAss
		start date	stop date	method	negative reference ranges																VASDisAc
		before 2002	2010-01-01	Sanquin, ELISA	≤12,5 kU/L																TotHAQsc
		2010-01-01	ongoing	Hycor, ELISA	≤49 kU/L																result 2010
CCP																					FUdiagn2yr_2010
		Reference ranges, units, kits and analyzers regarding aCCP																			DiagnosticoutcomeACR2010
		start date	stop date	method	negative reference ranges																Firstdiagnosis_1987
		before 2002	ongoing	Eurodiagnostica, ELISA	≤25 kAU/L																FUdiagn2yr_1987
ESR
		Reference ranges, units, kits and analyzers regarding ESR
		start date	stop date	method	reference limits
		before 2002	2009-04-01	Modified Westergren method	Adults ♂: < 6 mm/h
					Adults ♀: < 12 mm/h
		2009-04-01	ongoing	Modified Westergren method	0 - 1 mth: 0 to 2 mm/uur
					1 m - 10 yrs: 3 to13 mm/uur
					10 - 50 yrs: ♂ 0 - 15 mm/uur : ♀ 0 - 20 mm/uur
					>50 yrs: ♂ 0 - 20 mm/uur : ♀ 0 - 30 mm/uur
					Pregnant ♀ 3th trimester 0 - 30 mm/uur
CRP
		Reference ranges, units, kits and analyzers regarding CRP
		start date	stop date	method	reference limits
		before 2002	ongoing	Immune-turbidimetry	< 5 mg/L
				Roche Diagnostics
DAS28
(DiseaseActivityScore28)
TOTTJC68
(TotalTenderJointcount68)
TOTSJC66
(TotalSwollenJointCount66)
	-1	missing
VASpain
(VisualAnalogeScalePain)	mm
TotHAQsc
(TotalHAQscore)
	-1	missing
Firstdiagnosis_2010		baseline diagnosis according to the ACR 2010 criteria: at baseline study visit the patient file is checked to see if the patient fulfilled any diagnostic criteria for rheumatic diseases
	1	RA
	9	UA
FUdiagn2yr_2010		FU diagnosis according to the ACR 2010 criteria: after 2 years of follow up the patient file is checked again in case of UA to see if the patient now fulfilles any diagnostic criteria for rheumatic diseases
	1	RA
	9	UA
	-1	missing (usually because the patient has not been included in the trial for longer than 2 years)
DiagnosticoutcomeACR2010		Diagnostic Outcome According to the ACR 2010 criteria
	0	UA>>UA
	1	RA>>RA
	2	UA>>RA
	-1	missing
prognostic outcome after 2 yr FU			Rheumatoid Arthritis
		Clinical outcome after 2 years follow up	OsteoArthritis
	1	self limiting	Psoriatic Artritis
	2	persistent non-erosive
	3	persistent erosive	Unclassified Arthritis
	-1	missing
			Rheumatoid Arthritis
			OsteoArthritis
			Psoriatic Artritis
			Unclassified Arthritis
			See Arthritis Rheum. 2002 Feb;46(2):357-65. How to diagnose rheumatoid arthritis early: a prediction model for persistent (erosive) arthritis. Visser H, le Cessie S, Vos K, Breedveld FC, Hazes JM.
